# Supplementary material for: Hierarchical porous Cu2ZnSnS4 films for high-capacity reversible lithium storage applications
Source: Royal Society of Chemistry journal article supplement (doi:10.1039/c3ta11022b), 2013-01-01
Supplement: c3ta11022b.pdf [file c3ta11022b.pdf]

## Hierarchical porous $\text{Cu}_2\text{ZnSnS}_4$ film for high-capacity reversible lithium storage application

Xuesong Yin,<sup>a</sup> Chunhua Tang,<sup>a</sup> Maohua Chen,<sup>a</sup> Stefan Adams,<sup>a</sup> Hai Wang<sup>b</sup> and Hao Gong<sup>\*a</sup>

<sup>a</sup>Department of Materials Science and Engineering, National University of Singapore, 117576, Singapore

<sup>b</sup>Department of Physics and Key Laboratory of Yunnan Provincial Higher Education, Institutions for Organic Optoelectronic Materials and Devices, Kunming University, 650092, China

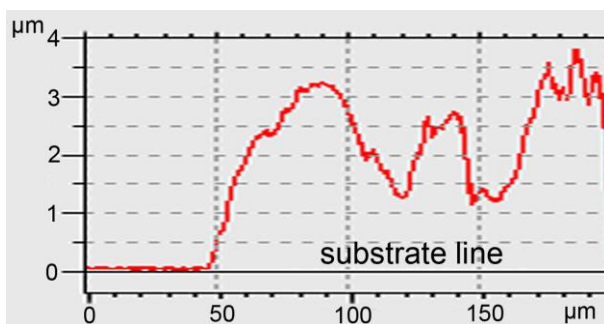

Figure S1. Step profiling of the porous CZTS film.

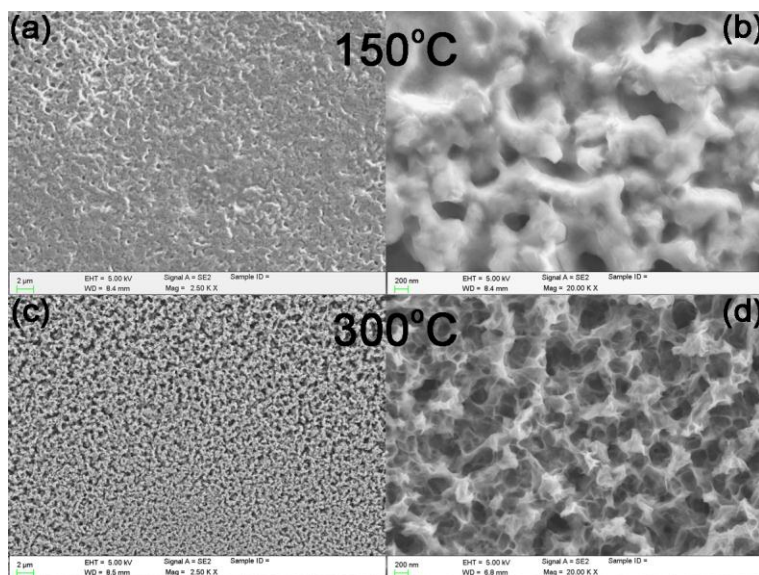

Figure S2. (a) Low magnification and (b) high magnification SEM images of CZTS thin film prepared at 150°C, and (c) Low magnification and (d) high magnification SEM images of CZTS thin film annealed at 300°C.

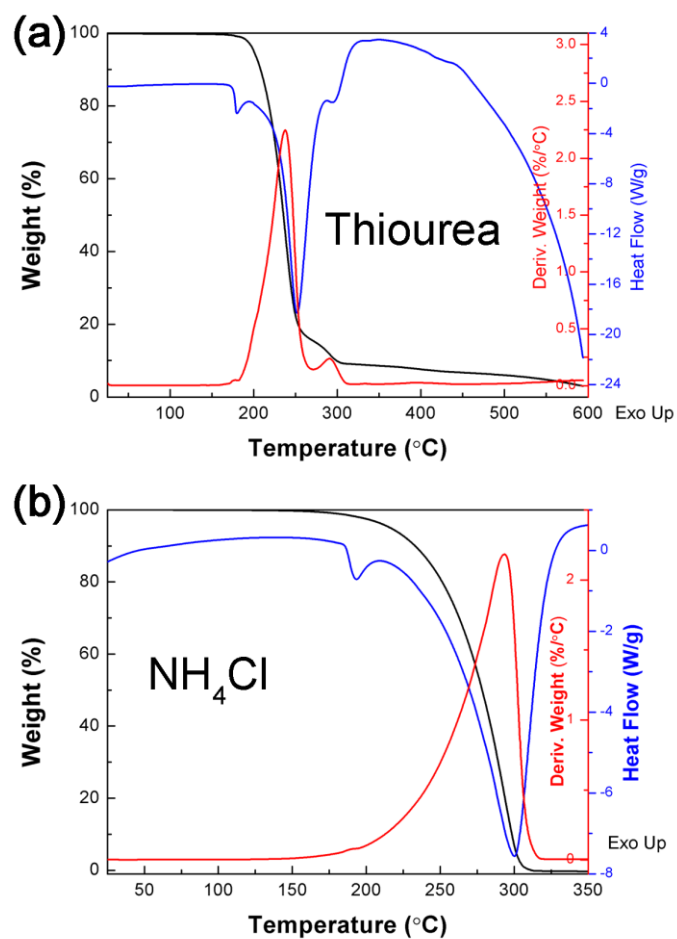

Figure S3. TGA and DSC analysis of (a) thiourea, (b) NH<sub>4</sub>Cl, (c) precursor annealed at 200°C and (d) precursor annealed at 300°C in N<sub>2</sub> flow with a heating rate of 10°C/min.

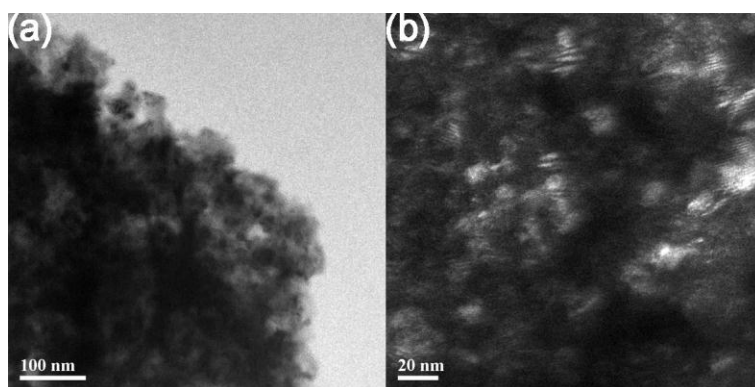

Figure S4. (a) Bright field and (b) dark field TEM images of porous CZTS layer
